# Supplementary material for: Recommended Cardiometabolic Screening Guidelines for Unhoused Adults: A Street Medicine Needs Assessment
Source: Research Square preprint supplement (doi:10.21203/rs.3.rs-6753820/v1), 2025-06-30
Supplement: Supplementary file 1 [file 83bbfcca4237a4d9d2be5582.docx]

**Not Addressed**

- No treatment or counseling was provided during the encounter. This may be due to limited resources, patient departure before completion, or lack of documented follow-up plan.

**Wound Care Package**

- Includes field-supplied materials such as hydrogen peroxide, coban wrap, bacitracin, silver gel, or ace bandages used for wound cleaning and protection.

**Topical Creams**

- Includes pain- or inflammation-relief creams and ointments such as diclofenac (Voltaren), capsaicin, menthol salicylate, hydrocortisone, lidocaine, or Vicks VapoRub.

**Oral Pain/Fever Reducing Medications**

- Includes over-the-counter analgesics such as acetaminophen (Tylenol) and ibuprofen (Advil or other NSAIDs) provided during the encounter.

**Guideline-Based Advice**

- Includes verbal counseling on blood pressure or glucose management, recommended timing for follow-up screenings, referrals to primary care or emergency care, and resource navigation (e.g., shelters, clinics).

**GI Medications**

- Includes medications provided or recommended for gastrointestinal complaints, such as proton pump inhibitors (PPIs), H2 blockers, or antacids.

**Allergy Drugs/Decongestants**

- Includes antihistamines or decongestants such as cetirizine (Zyrtec), loratadine (Claritin), or fexofenadine (Allegra).

**Durable Medical Equipment (DME)**

- Includes physical aids such as braces, splints, crutches, boots, or walkers supplied for mobility or injury support.

**Other**

- Includes various non-categorized supportive treatments such as eye drops, cough drops, electrolyte powders, iron tablets, or blankets distributed based on individual needs and environmental conditions.
