# Supplementary figures and images for: Recommended Cardiometabolic Screening Guidelines for Unhoused Adults: A Street Medicine Needs Assessment
Source: Research Square preprint supplement (doi:10.21203/rs.3.rs-6753820/v1), 2025-06-30

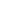

Supplement: Supplementary file 3 [file ec8b9afc658ad54b37cdbb3e.docx]
